# Supplementary material for: Nematicidal actions of the marigold exudate α-terthienyl: oxidative stress-inducing compound penetrates nematode hypodermis
Source: PubMed Central journal article supplement (PMC6504006; doi:10.1242/bio.038646), 2019-03-29
Supplement: biolopen-8-038646-s1.pdf [file biolopen-8-038646-s1.pdf]

## Supplementary materials

### Table S1. Primers for RNAi

---

Ceskn1EcoRI\_For, 5' – GGAATTCGGCCAATCCAAATATGATTATCCA – 3'  
Ceskn1EcoRI\_Rev, 5' – GGAATTCGGGCAGCAACCTTGTTCTTTCCG – 3'  
Cewdr-23\_For, 5' – AGGGAACAACATATTGCATTTAGT – 3'  
Cewdr-23\_RevEcoRI, 5' – GGGAATTCTTGGGATGATCGTATGGTGCAA – 3'

---

### Table S2. Primers for quantitative RT-PCR

---

Cegst-4\_qPCRFor, 5' – TGCTCAATGTGCCTTACGAGGA – 3'  
Cegst-4\_qPCRRev, 5' – GGGAAGCTGGCCAAATGGAG – 3'  
Cesod-1\_qPCRFor, 5' – GAAGCTGGAGCCGATGGAGT – 3'  
Cesod-1\_qPCRRev, 5' – GGCCAACGACAGTGTTTGGA – 3'  
Cectl-1\_qPCRFor, 5' – AGCCACGTCAGTTCTGGGAG – 3'  
Cectl-1\_qPCRRev, 5' – TCCTCCAAACAGCCACCCAA – 3'  
Cesnb-1\_qPCRFor, 5' – TGGAGCGTGATCAGAAGTTGTC – 3'  
Cesnb-1\_qPCRRev, 5' – TCCACCAATACTTGCGCTTCAG – 3'

---

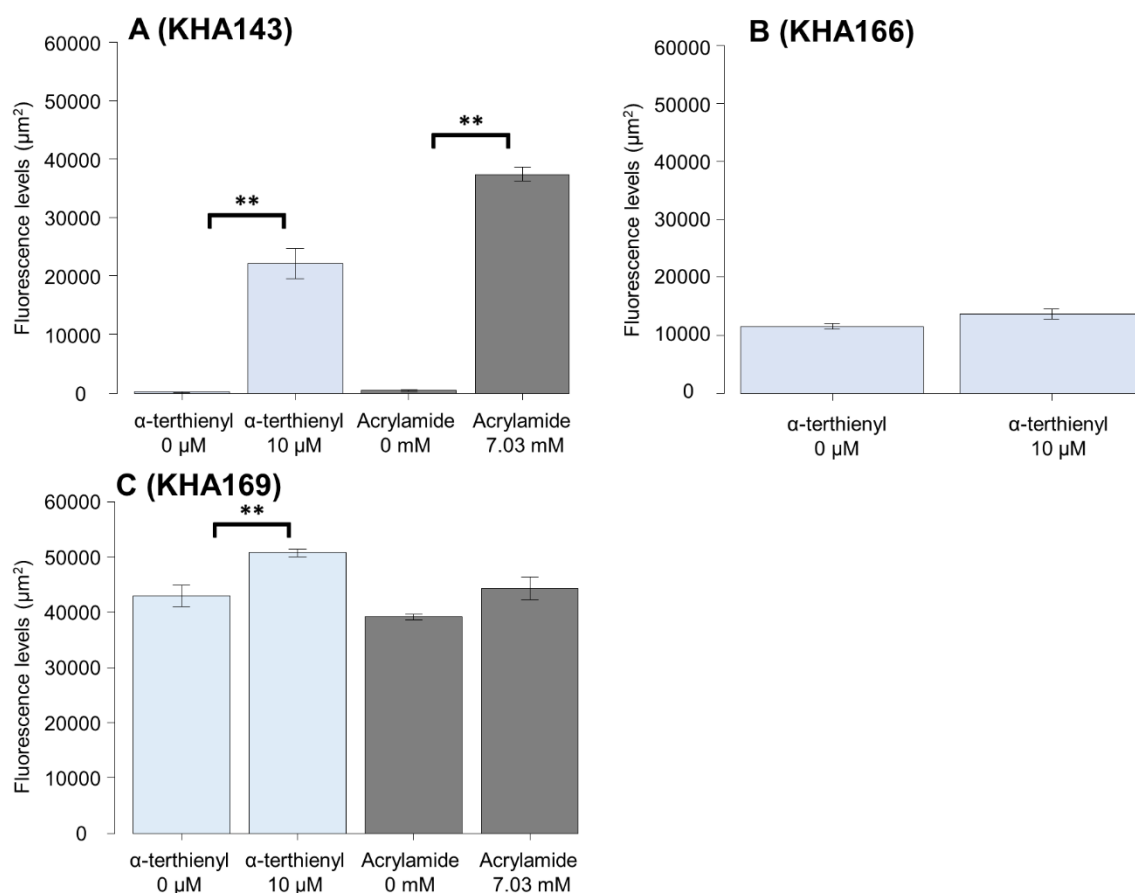

**Figure S1.** Quantitative analysis of GST-4, CTL-1, and SDO-1 expressions, treated with chemicals. (A) GST-4 expressions in the transgenic animal KHA143 were significantly induced when treated with 10  $\mu\text{M}$  of  $\alpha$ -terthienyl and 7.03 mM of acrylamide for 24 h. (B) CTL-1 expressions in the transgenic animal KHA166 were not induced when treated with 10  $\mu\text{M}$  of  $\alpha$ -terthienyl. (C) SOD-1 expressions in the transgenic animal KHA169 were significantly induced when treated with 10  $\mu\text{M}$  of  $\alpha$ -terthienyl. Induction of SOD-1 was not significantly but such trait was seen when treated with 7.03 mM of acrylamide for 24 h. GFP fluorescence signal densities from the individual nematodes ( $\text{pixels}/\mu\text{m}^2$ ) were measured from the photomicrographs with the Image J (NIH, <https://imagej.nih.gov/ij/>). Average  $\pm$  S.E. of each values was calculated from  $>8$  individuals from three ( $\alpha$ -terthienyl) or two (acrylamide) independent experiments (\*\* $P < 0.005$ , Mann-Whitney U test).

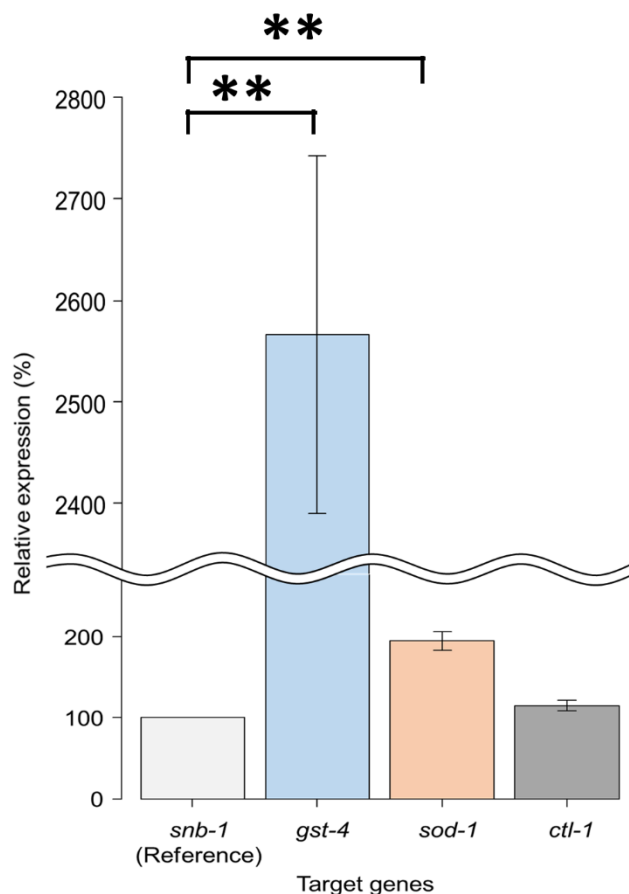

**Figure S2.** Quantitative RT-PCR analysis of *gst-4*, *sod-1*, and *ctl-1* expression changes after treated with 10  $\mu$ M of  $\alpha$ -terthienyl for 24 h. Expression changes of *gst-4*, *sod-1*, and *ctl-1* in *C. elegans* N2 were 2,567  $\pm$  169 %, 195  $\pm$  11.3%, and 115  $\pm$  6.55 % when treated with 10  $\mu$ M of  $\alpha$ -terthienyl. The housekeeping *snb-1* gene was used as an internal control gene for calculation of relative expression levels of each gene. Values are means  $\pm$  SE of from four independent experiments (\*\* $P$  < 0.005, Mann-Whitney U test followed by Bonferroni correction).

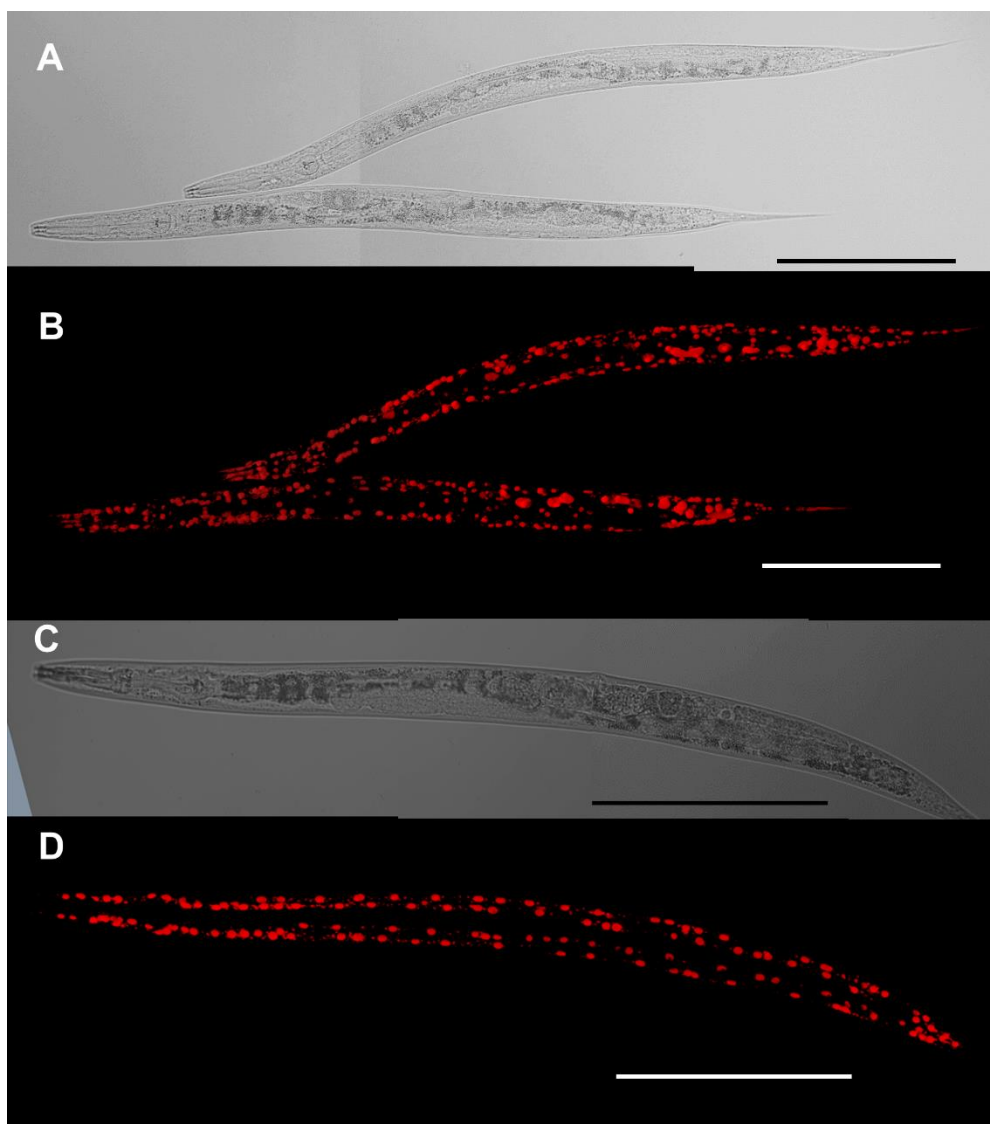

**Figure S3.** GST-4::NLS::RFP expression patterns in the transgenic nematode KHA117 *{chuIs117[unc-119(+), P<sub>gst-4</sub>::gst-4::nls::rfp]I}*. (A, B) GST-4::NLS::RFP expression was observed in almost all somatic nuclei when treated with 7.03 mM of acrylamide for 24 h. (C, D) GST-4::NLS::RFP expression was clearly observed in hypodermal cell nuclei when treated with 10  $\mu$ M of  $\alpha$ -terthienyl for 24 h. Scale bars, 200  $\mu$ m.

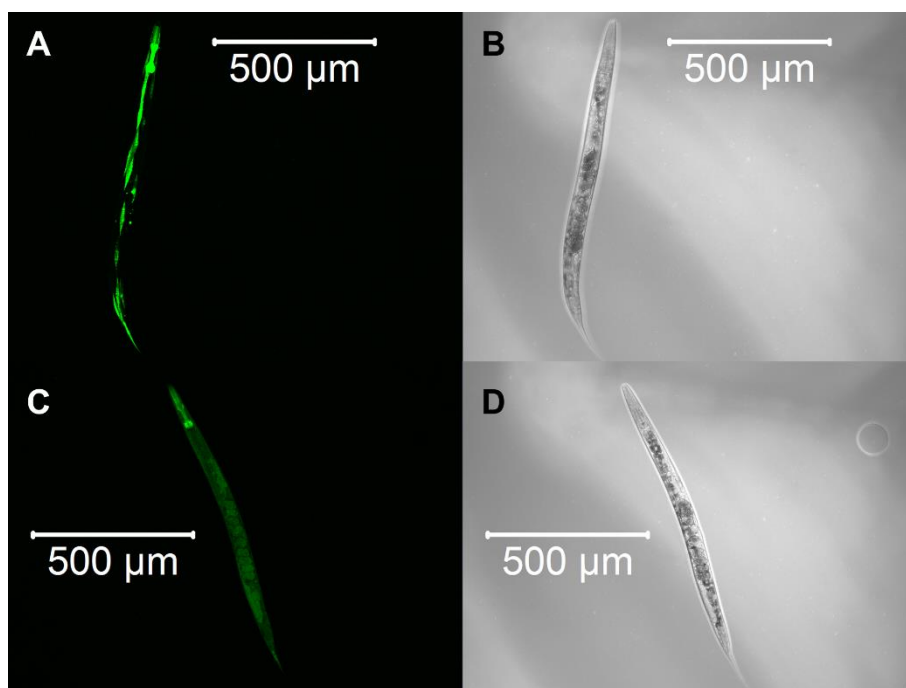

**Figure S4.** Knock down of *skn-1* by RNAi suppresses the inductions of GST-4::GFP and SOD-1::GFP expression even after treatment with 7.03 mM of acrylamide except for muscles. (A, B) GST-4::GFP in KHA143  $\{chuIs143[unc-119(+), Pgst-4::gst-4::gfp]II\}$  was observed only in pharynx and body-wall muscle after treatment with 7.03 mM of acrylamide for 24 h. (C, D) Induction of SOD-1::GFP expression in KHA169  $\{sod-1::gfp [chuSi169 gfp::3\times flag]II\}$  was observed only in pharynx after treatment with 7.03 mM of acrylamide for 24 h. Scale bars, 500  $\mu\text{m}$ .
